# Supplementary material
Source: PubMed Central journal article supplement (PMC5426228)
Supplement: NIHMS855869-supplement-supplement_1.pdf [file NIHMS855869-supplement-supplement_1.pdf]

**Supplementary Table 1. Cohort-specific characteristics of study population in the Prospective Study of AMH and Gynecologic Cancer Risk**

|                                                | Columbia<br>(N = 17)             | CLUE I/II<br>(N = 138) | EPIC<br>(N = 149)     | Guernsey<br>(N = 27)   | NHS/NHSII<br>(N = 35) | NYUWHS<br>(N = 96)    | NSHDS<br>(N = 94)     | ORDET<br>(N = 34)     | SWHS<br>(N = 81)    |
|------------------------------------------------|----------------------------------|------------------------|-----------------------|------------------------|-----------------------|-----------------------|-----------------------|-----------------------|---------------------|
|                                                | <i>Mean (SD) or median (IQR)</i> |                        |                       |                        |                       |                       |                       |                       |                     |
| Anti-Mullerian Hormone <sup>a</sup> ,<br>ng/mL | 1.18<br>(0.68-1.71)              | 1.22<br>(0.43-3.04)    | 1.03<br>(0.32-3.68)   | 0.60<br>(0.18-1.16)    | 0.74<br>(0.12-1.73)   | 1.13<br>(0.48-2.36)   | 0.97<br>(0.36-2.24)   | 1.04<br>(0.37-1.96)   | 0.44<br>(0.18-1.29) |
| Anti-Mullerian Hormone <sup>b</sup> ,<br>ng/mL | 1.43<br>(0.72-2.82)              | 1.17<br>(0.50-2.10)    | 1.15<br>(0.47-2.39)   | 1.11<br>(0.50-1.89)    | 1.26<br>(0.43-2.40)   | 0.99<br>(0.44-1.77)   | 1.12<br>(0.49-2.35)   | 1.09<br>(0.44-1.71)   | 1.12<br>(0.46-2.35) |
| Andronestendione, ng/dL                        | 141<br>(114-175.5)               | 83.9<br>(58.8-128.0)   | 134.7<br>(85.5-178.9) | 463<br>(360-567)       | -                     | 145<br>(107-212.5)    | 138<br>(118-214)      | 237.5<br>(207-400)    | -                   |
| DHEAS, µg/dL                                   | 95.1<br>(69.0-144.2)             | 109<br>(83-174)        | 73.6<br>(50.8-110.7)  | 183.4<br>(158.1-223.3) | -                     | 124.9<br>(82.5-180.5) | 102.6<br>(64.6-141.7) | 129.7<br>(89.4-239.5) | -                   |
| Testosterone, ng/dL                            | 41<br>(31-56.5)                  | 40<br>(22.0-47.2)      | 39<br>(27.5-48.2)     | 53<br>(50-84)          | -                     | 32<br>(26-44)         | 35<br>(28-38)         | 47.5<br>(39-60)       | -                   |
| SHBG, nmol/L                                   | 69.7<br>(43.5-91.0)              | 60.6<br>(47.6-82.8)    | 61.8<br>(44.1-79.7)   | 53.9<br>(39.1-68.4)    | -                     | 55.7<br>(44.0-74.8)   | 53.8<br>(37.8-62.7)   | 42.2<br>(32.9-56.9)   | -                   |
| Age at blood draw, yrs                         | 40.8<br>(39.5-42.7)              | 38.7<br>(33.6-42.7)    | 41.9<br>(39.6-44.6)   | 40.5<br>(36.5-43.7)    | 43.6<br>(41.3-45.4)   | 40.8<br>(38.6-43.2)   | 40.1<br>(39.9-40.3)   | 42.3<br>(38.9-43.8)   | 43.6<br>(42.1-44.7) |
| Height, cm                                     | 164.5 (4.4)                      | 163.2 (6.1)            | 160.7 (6.7)           | 162.8 (4.2)            | 164.6 (6.4)           | 162.3 (5.4)           | 165.3 (5.0)           | 158.1 (5.7)           | 160.4 (5.1)         |
| Body mass index, kg/m <sup>2</sup>             | 25.2 (6.9)                       | 26.8 (6.0)             | 24.7 (4.3)            | 24.8 (5.0)             | 24.9 (5.6)            | 23.5 (3.5)            | 24.7 (3.8)            | 25.1 (4.2)            | 23.1 (3.1)          |
| Age at menarche, yrs                           | 12.6 (1.2)                       | 12.3 (1.9)             | 12.6 (1.5)            | 13.0 (1.2)             | 12.9 (1.7)            | 12.4 (1.6)            | 13.3 (1.5)            | 12.9 (1.6)            | 14.9 (1.7)          |
|                                                | <i>Percentage</i>                |                        |                       |                        |                       |                       |                       |                       |                     |
| Race                                           |                                  |                        |                       |                        |                       |                       |                       |                       |                     |
| White                                          | 100 %                            | 99 %                   | -                     | 100 %                  | 97 %                  | 73 %                  | 98 %                  | 100 %                 | 0 %                 |
| Asian                                          | 0 %                              | 0 %                    | -                     | 0 %                    | 3 %                   | 0 %                   | 0 %                   | 0 %                   | 100 %               |
| Black or other                                 | 0 %                              | 1 %                    | -                     | 0 %                    | 0 %                   | 6 %                   | 0 %                   | 0 %                   | 0 %                 |
| Missing                                        | 0 %                              | 0 %                    | -                     | 0 %                    | 0 %                   | 21 %                  | 2 %                   | 0 %                   | 0 %                 |

Supplementary Table 1. Continued.

|                           | Columbia          | CLUE I/II | EPIC | Guernsey | NHS/NHSII | NYUWHS | NSHDS | ORDET | SWHS |
|---------------------------|-------------------|-----------|------|----------|-----------|--------|-------|-------|------|
|                           | <i>Percentage</i> |           |      |          |           |        |       |       |      |
| Education                 |                   |           |      |          |           |        |       |       |      |
| High school of less       | -                 | 73 %      | 52 % | -        | 0 %       | 16 %   | 52 %  | 62 %  | 95 % |
| Vocational school         | -                 | 0 %       | 26 % | -        | 0 %       | 4 %    | 11 %  | 6 %   | 4 %  |
| Attended college          | -                 | 26 %      | 22 % | -        | 100 %     | 64 %   | 26 %  | 32 %  | 1 %  |
| Missing                   | -                 | 1 %       | 0 %  | -        | 0 %       | 17 %   | 12 %  | 0 %   | 0 %  |
| Smoking status            |                   |           |      |          |           |        |       |       |      |
| Never                     | 53 %              | 55 %      | 54 % | 48 %     | 57 %      | 42 %   | 36 %  | 68 %  | 100  |
| Past                      | 18 %              | 15 %      | 19 % | 4 %      | 31 %      | 32 %   | 15 %  | 12 %  | 0    |
| Current                   | 29 %              | 30 %      | 27 % | 26 %     | 11 %      | 17 %   | 20 %  | 21 %  | 0    |
| Missing                   | 0 %               | 0 %       | 1 %  | 22 %     | 0 %       | 9 %    | 29 %  | 0 %   | 0    |
| Oral contraceptive use    |                   |           |      |          |           |        |       |       |      |
| Never                     | 29 %              | 14 %      | 23 % | 37 %     | 20 %      | 23 %   | 20 %  | 44 %  | 89 % |
| Past                      | 59 %              | 19 %      | 58 % | 52 %     | 80 %      | 67 %   | 30 %  | 56 %  | 11 % |
| Current                   | 12 %              | 7 %       | 6 %  | 11 %     | 0 %       | 0 %    | 3 %   | 0 %   | 0 %  |
| Missing                   | 0 %               | 60 %      | 12 % | 0 %      | 0 %       | 10 %   | 47 %  | 0 %   | 0 %  |
| Total number of pregnancy |                   |           |      |          |           |        |       |       |      |
| 0                         | 0 %               | 3 %       | 11 % | 19 %     | 17 %      | 45 %   | 10 %  | 9 %   | 0 %  |
| 1                         | 24 %              | 2 %       | 12 % | 7 %      | 9 %       | 8 %    | 9 %   | 15 %  | 32 % |
| 2                         | 12 %              | 10 %      | 30 % | 41 %     | 31 %      | 34 %   | 22 %  | 47 %  | 36 % |
| ≥3                        | 65 %              | 9 %       | 33 % | 33 %     | 43 %      | 7 %    | 37 %  | 29 %  | 32 % |
| Missing                   | 0 %               | 76 %      | 15 % | 0 %      | 0 %       | 5 %    | 22 %  | 0 %   | 0 %  |
| Menstrual phase           |                   |           |      |          |           |        |       |       |      |
| Follicular                | 24 %              | 47 %      | 40 % | 48 %     | 3 %       | 53 %   | -     | 0 %   | 42 % |
| Luteal                    | 65 %              | 53 %      | 38 % | 48 %     | 54 %      | 47 %   | -     | 100 % | 58 % |
| Missing                   | 12 %              | 0 %       | 22 % | 4 %      | 43 %      | 0 %    | -     | 0 %   | 0 %  |

Abbreviations: Columbia, the Columbia, Missouri (USA); the CLUE I/II, Campaign Against Cancer and Heart Disease (USA); EPIC, the European Prospective Investigation into Cancer and Nutrition Cohort study (Europe); Guernsey, the Guernsey Cohort Study (UK); NYUWHS, the New York University Women's Health Study (USA); NHS/NHSII, the Nurses' Health Studies (USA); ORDET, the Hormones and Diet in the Etiology of Breast Cancer study (Italy); NSHDS, Northern Sweden Health and Disease Study (Sweden); SWHS, the Shanghai

---

Women's Health Study (China)

<sup>a</sup>AMH values are unadjusted raw values.

<sup>b</sup>AMH values are adjusted for age at blood draw and current use of oral contraceptives.

**Supplementary Table 2. Multivariable-adjusted median and the interquartile range of anti-müllerian hormone (ng/mL) across demographics and lifestyle factors in the Prospective Study of AMH and Gynecologic Cancer Risk from 5 multiply imputed datasets**

| Factors                            | Multivariable model <sup>a</sup> | P-value <sup>b</sup> |
|------------------------------------|----------------------------------|----------------------|
| Age (yrs)                          |                                  |                      |
| <35                                | 2.53 (0.62-4.54)                 | <0.001               |
| ≥35-<40                            | 1.57 (0.67-3.00)                 |                      |
| ≥40                                | 0.70 (0.24-1.45)                 |                      |
| Race                               |                                  |                      |
| White                              | 1.11 (0.44-2.13)                 | 0.92                 |
| Asian                              | 1.09 (0.44-2.19)                 |                      |
| Education                          |                                  |                      |
| High school or less                | 1.12 (0.45-2.12)                 | 0.65                 |
| Vocational school                  | 1.38 (0.43-2.88)                 |                      |
| Attended college                   | 1.12 (0.44-2.14)                 |                      |
| Height (cm)                        |                                  |                      |
| ≤157.7                             | 1.03 (0.39-2.12)                 | 0.42                 |
| >157.7-≤162                        | 1.20 (0.46-2.38)                 |                      |
| >162-≤167                          | 1.06 (0.44-1.93)                 |                      |
| >167                               | 1.21 (0.55-2.34)                 |                      |
| BMI (kg/m <sup>2</sup> )           |                                  |                      |
| <20                                | 1.17 (0.47-2.11)                 | 0.94                 |
| ≥20-<25                            | 1.09 (0.41-2.16)                 |                      |
| ≥25-<30                            | 1.18 (0.46-2.40)                 |                      |
| ≥30                                | 1.17 (0.59-2.06)                 |                      |
| Smoking status                     |                                  |                      |
| Never                              | 1.19 (0.49-2.29)                 | 0.47                 |
| Past                               | 1.00 (0.34-1.97)                 |                      |
| Current                            | 1.10 (0.46-1.89)                 |                      |
| Current use of oral contraceptives |                                  |                      |
| No                                 | 1.16 (0.47-2.22)                 | 0.21                 |
| Yes                                | 0.66 (0.04-1.60)                 |                      |
| Parity                             |                                  |                      |
| by Never/Ever                      |                                  |                      |
| Nulliparous                        | 1.19 (0.41-2.07)                 | 0.60                 |
| Parous                             | 1.11 (0.46-2.20)                 |                      |
| by Total number of childbirths     |                                  |                      |
| Nulliparous                        | 1.17 (0.43-2.09)                 | 0.48                 |
| 1 child                            | 1.02 (0.38-1.84)                 |                      |
| 2 children                         | 1.06 (0.45-2.27)                 |                      |
| ≥3 children                        | 1.25 (0.50-2.29)                 |                      |

**Supplementary Table 2. Continued.**

| Factors              | Multivariable model <sup>a</sup> | P-value <sup>b</sup> |
|----------------------|----------------------------------|----------------------|
| Age at menarche, yrs |                                  |                      |
| <12                  | 1.05 (0.40-1.96)                 | 0.12                 |
| 12-<13               | 1.05 (0.43-2.28)                 |                      |
| 13-<14               | 1.14 (0.48-2.03)                 |                      |
| ≥14                  | 1.22 (0.47-2.37)                 |                      |
| Menstrual cycle      |                                  |                      |
| Follicular           | 1.11 (0.43-2.13)                 | 0.79                 |
| Luteal               | 1.15 (0.47-2.21)                 |                      |

<sup>a</sup> Model adjusted for age (continuous, yrs), current use of oral contraceptives (yes, no) and age at menarche (<12, 12-<13, 13-<14, ≥14 yrs).

<sup>b</sup> P-values were calculated using an F-test in each of 5 multiply imputed dataset, using a continuous term for continuous variables (age, height, body mass index, number of childbirths and age at menarche) or a nominal term for categorical variables (race, education, smoking status, current uses of oral contraceptives, ever parity, menstrual cycle), and combined using Rubin's rule.
